# Supplementary material for: Renal neoplasms in tuberous sclerosis mice are neurocristopathies
Source: PubMed Central journal article supplement — iScience. 2021 Jun 4;24(7):102684. doi: 10.1016/j.isci.2021.102684 (PMC8243016; doi:10.1016/j.isci.2021.102684), 2021-06-04
Supplement: mmc1.pdf [file mmc1.pdf]

**iScience, Volume 24**

**Supplemental information**

**Renal neoplasms in tuberous sclerosis mice  
are neurocristopathies**

**Uchenna Unachukwu, Takayuki Shiomi, Monica Goldklang, Kiran Chada, and Jeanine D'Armiento**

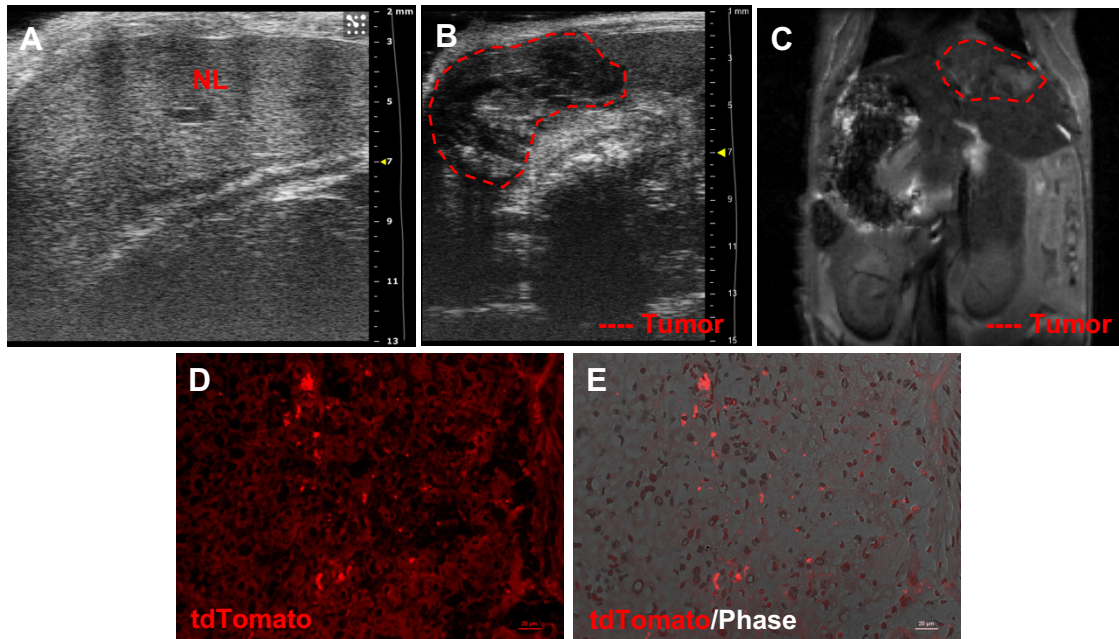

**Supplemental Figure S1: Visualizing Neural Crest Lineage Cells in  $Tsc2^{+/-}$  Mouse Hepatic Tumors (Related to Figures 1 and 3)** - Ultrasound images of normal liver tissue of  $Tsc2^{+/+}Mpz(Cre)/TdT^{fl/fl}$  mice (**A**) compared to demarcated tumorigenic hepatic region (red dashes) in  $Tsc2^{+/-}Mpz(Cre)/TdT^{fl/fl}$  mice (**B**). **C**) The occurrence of hepatic lesions in  $Tsc2^{+/-}Mpz(Cre)/TdT^{fl/fl}$  mice was confirmed using small animal MRI. **D**) Fluorescent image of representative immunohistochemical slices (4 $\mu$ M) obtained from hepatic lesions of  $Tsc2^{+/-}Mpz(Cre)/TdT^{fl/fl}$  mice viewed using excitation filter 540/45nm showing punctate tdTomato<sup>+</sup> NCCs. **E**) Merged tdTomato and phase images of the hepatic lesions. N=2 slides; 3 sections/slide was used to visualize consistency of hepatic lesions in  $Tsc2^{+/-}Mpz(Cre)/TdT^{fl/fl}$  mice. Scale bar = 20 $\mu$ m.
